# Supplementary material for: The Structure and Regulation of Human Muscle α-Actinin
Source: PubMed Central journal article supplement — Cell. 2014 Dec 4;159(6):1447–60. doi: 10.1016/j.cell.2014.10.056 (PMC4259493; doi:10.1016/j.cell.2014.10.056), 2014-12-04
Supplement: mmc1.pdf [file mmc1.pdf]

Table S1. Data Collection and Refinement Statistics, Related to Figure 1

| <b>Data Collection</b>                  |                                                |
|-----------------------------------------|------------------------------------------------|
| Space group                             | P 2 <sub>1</sub> 2 <sub>1</sub> 2 <sub>1</sub> |
| <i>a, b, c</i> (Å)                      | 73.3, 102.6, 183.0                             |
| Wavelength (Å)                          | 0.87260                                        |
| Resolution range (Å)                    | 51.31 - 3.50 (3.83 - 3.50)                     |
| Total Reflections                       | 153,163                                        |
| Unique Reflections                      | 18,047                                         |
| Completeness (%)                        | 99.8 (99.8)                                    |
| Multiplicity                            | 8.5 (8.7)                                      |
| R <sub>merge</sub> (%)                  | 20.2 (129.5)                                   |
| R <sub>p.i.m.</sub> (%)                 | 7.5 (47.8)                                     |
| CC <sub>1/2</sub> (%)                   | 99.8 (66.5)                                    |
| <i>I</i> / $\sigma$ ( <i>I</i> )        | 11.2 (2.9)                                     |
| Wilson B factor (Å <sup>2</sup> )       | 69.4                                           |
| <b>Refinement</b>                       |                                                |
| Resolution range (Å)                    | 51.3 - 3.50                                    |
| R <sub>work</sub> (%)                   | 20.47                                          |
| R <sub>free</sub> (%)                   | 25.80                                          |
| Number of total reflections             | 18,003                                         |
| Number of R <sub>free</sub> reflections | 920                                            |
| Number of protein atoms                 | 6,871                                          |
| B factors (Å <sup>2</sup> )             | 97.70                                          |
| Rmsd Bond length (Å)                    | 0.011                                          |
| Rmsd Bond angles (°)                    | 1.592                                          |
| <b>Ramachandran Plot</b>                |                                                |
| Favoured (%)                            | 93.71                                          |
| Allowed (%)                             | 6.06                                           |
| Outliers (%)                            | 0.23                                           |

The highest resolution shell is in parentheses. R<sub>merge</sub> is the merging R factor. R<sub>p.i.m.</sub> is the precision-indicating merging R factor (Weiss and Hilgenfeld, 1997) and CC<sub>1/2</sub> the half dataset correlation coefficient (Karplus and Diederichs, 2012).

Table S2. Structural Comparison of the  $\alpha$ -Actinin-2 Spectrin-like Repeats SR1-SR4, Related to Figures 2 and S1

| SR ID      |      | SR1   | SR1   | SR2          | SR2          | SR3          | SR3          | SR4          | SR4          |
|------------|------|-------|-------|--------------|--------------|--------------|--------------|--------------|--------------|
|            | PDB  | 1HCI  | 4D1E  | 1HCI         | 4D1E         | 1HCI         | 4D1E         | 1HCI         | 4D1E         |
| <b>SR1</b> | 1HCI |       | 1.890 | 2.663        | 2.838        | 2.586        | 2.455        | 2.772        | 4.054        |
| <b>SR1</b> | 4D1E | 0.716 |       | 2.917        | 3.129        | 2.623        | 2.571        | 3.329        | 2.949        |
| <b>SR2</b> | 1HCI | 0.427 | 0.355 |              | <b>0.790</b> | 1.710        | 2.677        | 1.615        | 1.719        |
| <b>SR2</b> | 4D1E | 0.387 | 0.344 | <b>0.871</b> |              | 1.722        | 2.035        | 2.624        | 1.691        |
| <b>SR3</b> | 1HCI | 0.537 | 0.496 | 0.589        | 0.543        |              | <b>0.999</b> | 1.720        | 1.848        |
| <b>SR3</b> | 4D1E | 0.561 | 0.513 | 0.410        | 0.475        | <b>0.886</b> |              | 2.060        | 2.113        |
| <b>SR4</b> | 1HCI | 0.407 | 0.379 | 0.555        | 0.372        | 0.615        | 0.555        |              | <b>0.868</b> |
| <b>SR4</b> | 4D1E | 0.294 | 0.354 | 0.539        | 0.488        | 0.615        | 0.567        | <b>0.859</b> |              |

Left column, upper row: spectrin repeat identifier; second left column, second upper row: PDB entry (1HCI the rod domain, 4D1E the full length structure). Values in bold denote the highly similar structures. Rmsd (upper right values, in Å) and Q-score (lower left values). Q-score represents the quality function of C $\alpha$ -alignment, taking into account both the alignment length and rmsd.

Table S3. Rotamer Library Simulation, Related to Figure 3

| Cysteine residue | No. of rotamers | $\alpha$ -actinin-2 domain | Cysteine pair          | Distance      |
|------------------|-----------------|----------------------------|------------------------|---------------|
|                  |                 |                            | Intrachain             |               |
| 161              | 1 <sup>2</sup>  | ABD                        | <u>483 - 487</u>       | <u>7 ± 3</u>  |
| 187              | 1 <sup>2</sup>  | ABD                        | <u>48 - 251</u>        | <u>15 ± 3</u> |
| 48               | 5               | ABD                        | 251 - 270              | 30 ± 4        |
| 862              | 7               | EF3-4                      | 48 - 270               | 34 ± 4        |
| 251              | 18              | ABD                        | 270 - 339              | 36 ± 6        |
| 339              | 21              | SR1                        | 781 - 862              | 37 ± 2        |
| 483              | 34              | SR2                        | 161 - 187 <sup>2</sup> | 13 ± 1        |
| 781              | 36              | EF1-2                      | 187 - 251 <sup>2</sup> | 14 ± 3        |
| 270              | 61              | NECK                       | 161 - 251 <sup>2</sup> | 17 ± 1        |
| 487              | 70              | SR2                        | 161 - 270 <sup>2</sup> | 26 ± 3        |
|                  |                 |                            | 48 - 161 <sup>2</sup>  | 27 ± 1        |
|                  |                 |                            | 48 - 187 <sup>2</sup>  | 27 ± 1        |
|                  |                 |                            | 187 - 270 <sup>2</sup> | 35 ± 3        |
|                  |                 |                            | Interchain             |               |
|                  |                 |                            | <u>270 - 862</u>       | <u>12 ± 2</u> |
|                  |                 |                            | 251 - 862              | 27 ± 2        |
|                  |                 |                            | 339 - 781              | 28 ± 4        |
|                  |                 |                            | 48 - 862               | 32 ± 4        |
|                  |                 |                            | 339 - 862              | 36 ± 4        |
|                  |                 |                            | 270 - 781              | 38 ± 3        |
|                  |                 |                            | 48 - 781               | 39 ± 4        |

Number of rotamers for each spin labelled cysteine residue and main distances up to 45 Å<sup>1</sup> ( $\pm$  rmsd, in Å) between spin labels of all cysteine residues based on the crystal structure of  $\alpha$ -actinin-2, calculated by the software MMM (Polyhach et al., 2011). Most probable cysteine pairs contributing to the distance distribution < 20 Å (**Figures 3A-B, S3**) are underlined.

<sup>1</sup> The DEER dipolar evolution time (d2) of 2.8  $\mu$ s used for the Q-band experiments does not allow detection of distances above 45 Å.

<sup>2</sup> Sites 161, 187 and 48 can be labelled with few rotamers of the library, meaning they are probably too tight to be labelled experimentally. Therefore, pair distance distributions accounting for one of these two sites are unlikely to be detected in the experimental data.

Table S4. Summary of Binding Affinities of  $\alpha$ -Actinin Complexes (Dissociation Constants), Related to Figure 3

| $\alpha$ -actinin-2 constructs | Ligand                                  | $K_d$ ( $\mu\text{M}$ , $\pm\text{SD}$ )            | Method           |
|--------------------------------|-----------------------------------------|-----------------------------------------------------|------------------|
| WT                             | PIP2-C16*                               | 2.96 $\pm$ 0.26 <sup>a, (i)</sup>                   | MST <sup>1</sup> |
| WT (+Tween 20)                 | Zr-7                                    | 2.90 $\pm$ 0.12 <sup>a, (ii)</sup>                  | MST              |
| WT+PIP2-C16* (+Tween 20)       | Zr-7                                    | 0.48 $\pm$ 0.13 <sup>a(iii)</sup>                   | MST              |
| WT+PIP2-C16*                   | Zr-7                                    | 0.38 $\pm$ 0.06 <sup>a, (ii)</sup>                  | MST              |
| PIP2mut (+Tween 20)            | Zr-7                                    | 2.76 $\pm$ 0.34 <sup>a, (ii)</sup>                  | MST              |
| PIP2mut+PIP2-C16*              | Zr-7                                    | 1.60 $\pm$ 0.22 <sup>a, (ii)</sup>                  | MST              |
| NEECK (+Tween 20)              | Zr-7                                    | 0.92 $\pm$ 0.02 <sup>a, (ii)</sup>                  | MST              |
| EF1-4 (+Tween 20)              | Zr-7                                    | 0.24 $\pm$ 0.04 <sup>a, (ii)</sup>                  | MST              |
| EF1-4                          | Zr-7                                    | 0.19 $\pm$ 0.01 <sup>b</sup> ,<br>0.10 <sup>c</sup> | ITC <sup>2</sup> |
| EF1-4                          | Zr-7                                    | 0.10-0.30                                           | CD <sup>3</sup>  |
| EF1-4                          | $\alpha$ -actinin-2<br>ABD-NECK-<br>SR1 | 0.57 $\pm$ 0.03 <sup>b</sup>                        | ITC              |

<sup>a</sup>Measured in this study, <sup>b</sup>(Young and Gautel, 2000), <sup>c</sup>(Joseph et al., 2001).

<sup>1</sup>Microscale Thermophoresis, <sup>2</sup>Isothermal Titration Calorimetry, <sup>3</sup>Circular Dichroism.

(i),(ii). Values are derived from binding isotherms shown in the **Figure 3D-F**.

(iii). The CMC of PIP2-C16\* determined under our experimental conditions is  $\approx 100 \mu\text{M}$ , addition of Tween-20 (0.05% v/v) decreased the CMC significantly to 10-15  $\mu\text{M}$ . It is possible that in the Tween-20/PIP2-C16\* mixture, non-micellar PIP2-C16\* concentration is reduced for interaction with  $\alpha$ -actinin-2. Nevertheless, we still observe a positive effect of the Tween-20 (0.05% v/v) /PIP2-C16\* (80  $\mu\text{M}$ ) mixture on  $\alpha$ -actinin-2 binding to titin Zr-7 when compared to  $\alpha$ -actinin-2 in presence of Tween-20 alone. PIP2-C16\* ( $\approx 40 \mu\text{M}$ ) alone showed the same activation of titin Zr-7 binding as seen in samples with addition Tween-20 + 80  $\mu\text{M}$  PIP2-C16\*. Control experiments using the PIP2 mutant evaluated the selectivity of this PIP2-C16\* regulation and confirmed that PIP2 mutant has lower affinity for PIP2-C16\* (**Figure 3D**), reducing the activating effect on Zr-7 binding (**Figures 3 and 5F**). In essence, these results show that the addition of Tween-20 does not affect the major regulatory function of PIP2- C16\* on  $\alpha$ -actinin-2 activation.

\*Fluorescently labelled Bodipy-TMR-PIP2-C16 (chemical structure is shown in **Figure S2A**)

Table S5. Overall Structural Parameters from SAXS and SEC-MALLS Data, Related to Figure 4

| Parameters*              | Wild-type $\alpha$ -actinin-2 | NEECK mutant |
|--------------------------|-------------------------------|--------------|
|                          | <b>SAXS</b>                   |              |
| MM <sub>calc</sub> (kDa) | 211.3                         | 211.3        |
| MM (kDa)                 | 210±15                        | 190±15       |
| Rg <sup>XT</sup> (Å)     | 114                           | 114          |
| R <sub>g</sub> (Å)       | 118±3                         | 120±3        |
| D <sub>max</sub> (Å)     | 370±10                        | 390±10       |
| $\chi^{XT}$              | 2.35                          | 2.67         |
| $\chi^{RB}$              | 1.25                          | 1.14         |
|                          | <b>SEC-MALLS</b>              |              |
| MM (kDa)                 | 205.3±5.5                     | 204.6±4.7    |
| R <sub>s</sub> (Å)       | 61.3±0.2                      | 60.5±0.1     |
| V <sub>el</sub> (ml)     | 9.64±0.01                     | 9.49±0.03    |

MM, R<sub>g</sub>, D<sub>max</sub>, R<sub>s</sub>, V<sub>el</sub> denote the molecular mass, radius of gyration, maximum size, Stokes' radius and elution volume, respectively. Parameters without superscripts are experimental values; superscripts RB, and XT refer to rigid-body fitted models and the crystal structure, respectively. MM<sub>calc</sub> is the theoretical MM of  $\alpha$ -actinin-2 dimer computed from the protein sequence. The discrepancy between experimental data and those computed from models is defined by  $\chi^{XT}$  and  $\chi^{RB}$  values.

\*Data are represented as mean values ± SD when applicable
